# Supplementary material
Source: publisher figshare collection journal article supplement (https://acs.figshare.com/ndownloader/files/4467898)
Supplement: Supplementary file 1 [file 4467898]

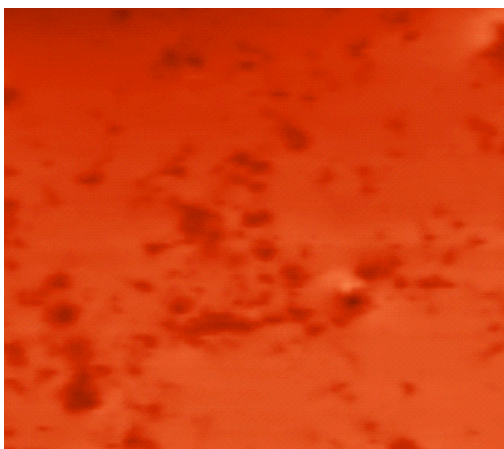

**TDI70**

***Figure S1:*** *AFM* topograph of aromatic (*TDI* based) polyurethane of 70% *HSC*.

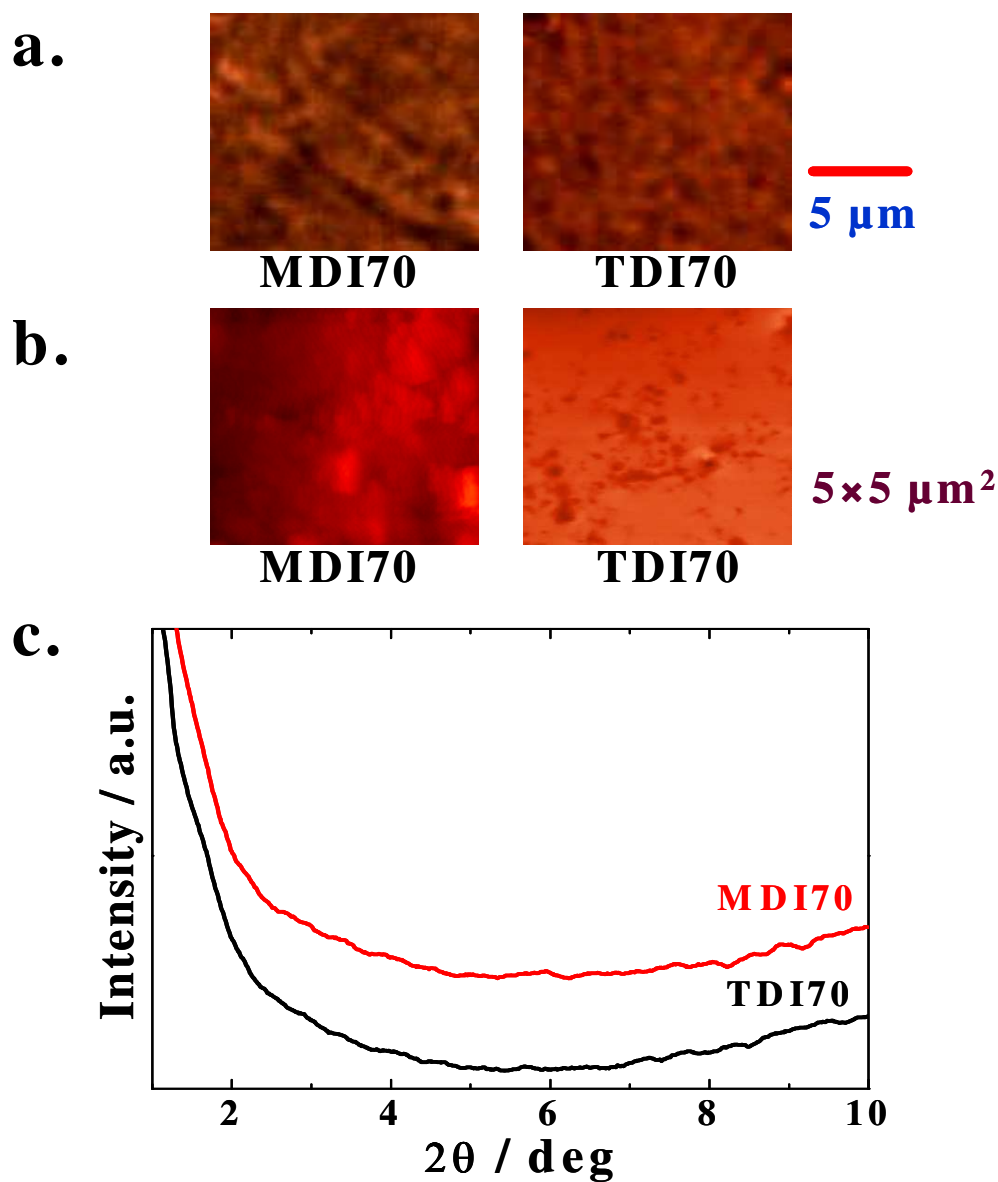

**Figure S2:** The self-assembled microstructure and nanostructure of aromatic polyurethanes with high (70%) HSC content. (a) Optical images of different indicated aromatic PUs showing minimal cluster size. (b) AFM micrographs for tow indicated aromatic PUs which do not exhibit any pattern there, except few agglomerates. (c) The X-ray diffraction patterns for indicated PUs showing no nanostructures.

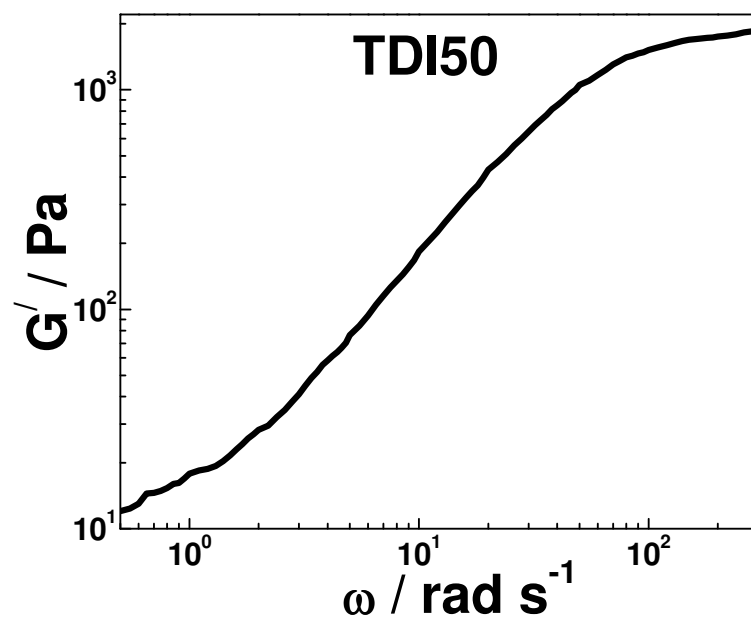

**Figure S3:** Frequency dependence storage modulus of aromatic (*TDI* based) polyurethane of 50% HSC.

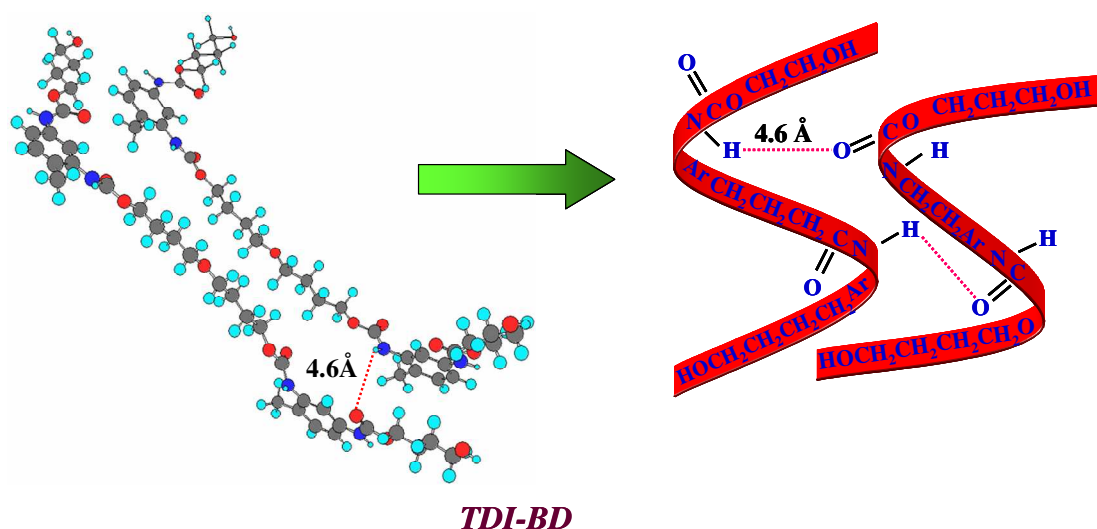

**Figure S4:** Molecular model of aromatic polyurethane (*TDI* based) molecules obtained from energy minimized electronic structure calculation from a part of chains in the left side showing the distance of hydrogen bonded interaction sites leading to self-assembly in aromatic diisocyanate and right portions indicate the schematic view of the organization from a bigger chain. Parallel and curved chains are expected in aromatic polyurethanes with longer hydrogen bonded distance as compared to aliphatic one.
